# Supplementary material
Source: HighWire-hosted journal article supplement (https://erj.ersjournals.com/content/56/1/2001201)
Supplement: inline-supplementary-material-1 [file inline-supplementary-material-1.pdf]

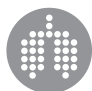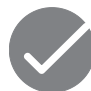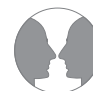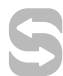

SHAREABLE PDF

# Venous thromboembolism in SARS-CoV-2 patients: only a problem in ventilated ICU patients, or is there more to it?

Maarten Criel <sup>1</sup>, Maarten Falter <sup>1</sup>, Jasmien Jaeken<sup>1</sup>, Margaretha Van Kerrebroeck<sup>1</sup>, Isabelle Lefere<sup>2</sup>, Liesbeth Meylaerts<sup>2</sup>, Dieter Mesotten<sup>3,4</sup>, Margot vander Laenen<sup>4</sup>, Tom Fizev<sup>4</sup>, Michiel Thomeer <sup>1,3</sup> and David Ruttens<sup>1</sup>

**Affiliations:** <sup>1</sup>Dept Pulmonary Medicine, Ziekenhuis Oost Limburg, Genk, Belgium. <sup>2</sup>Dept Radiology, Ziekenhuis Oost Limburg, Genk, Belgium. <sup>3</sup>Dept of Medicine and Life Sciences, Hasselt University, Diepenbeek, Belgium. <sup>4</sup>Dept of Anaesthesiology, Intensive Care, Emergency Medicine and Pain Therapy, Ziekenhuis Oost-Limburg, Genk, Belgium.

**Correspondence:** David Ruttens, Ziekenhuis Oost-Limburg, Pulmonary Medicine, Schiepse Bos 6, Genk 3600, Belgium. E-mail: david.ruttens@zol.be

@ERSpublications

**Insidious venous thromboembolism (VTE) is mainly a problem in ICU-ventilated SARS-CoV-2 patients, while patients in the general ward, treated with thromboprophylaxis (0.5 mg·kg<sup>-1</sup>), had a low incidence of insidious VTE** <https://bit.ly/2Yl8jft>

**Cite this article as:** Criel M, Falter M, Jaeken J, *et al.* Venous thromboembolism in SARS-CoV-2 patients: only a problem in ventilated ICU patients, or is there more to it?. *Eur Respir J* 2020; 56: 2001201 [<https://doi.org/10.1183/13993003.01201-2020>].

This single-page version can be shared freely online.

## To the Editors:

Venous thromboembolism (VTE) is a well-known complication in hospitalised patients [1–5]. Risk factors include older age, obesity, immobilisation, active malignancy, systemic inflammatory response syndrome (SIRS), (major) surgery, thrombophilia and a history of thromboembolism [2, 5]. In 1884, Rudolph Virchow first described the underlying pathophysiological mechanisms, which consist of endothelial cell dysfunction/inflammation, low blood flow and blood hypercoagulability. Current guidelines recommend the use of thromboprophylaxis in acutely ill medical patients who are at high risk for VTE (Padua score  $\geq 4$ , IMPROVE (International Medical Prevention Registry on Venous Thromboembolism) score  $\geq 2$ ) [6]. However, in medical practice, less than half of the patients at risk receive adequate thromboprophylaxis [4].
